1 **Bridging the TB data gap: *in silico* extraction of**  
2 **rifampicin-resistant tuberculosis diagnostic test**  
3 **results from whole genome sequence data**  
4  
5

6 Kamela Charmaine S. Ng<sup>1,2</sup>, Jean Claude S. Ngabonziza<sup>1,3</sup>, Pauline Lempens<sup>1</sup>, Bouke Catherine  
7 de Jong<sup>1</sup>, Frank van Leth<sup>2,4</sup>, Conor Joseph Meehan<sup>1,5</sup>  
8

9 <sup>1</sup> Mycobacteriology Unit, Department of Biomedical Sciences, Institute of Tropical Medicine,  
10 Antwerp, Belgium

11 <sup>2</sup> Amsterdam Institute for Global Health and Development, University of Amsterdam,  
12 Amsterdam, The Netherlands

13 <sup>3</sup> Department of Biomedical Services, Rwanda Biomedical Center, Kigali, Rwanda

14 <sup>4</sup> Department of Global Health, Amsterdam UMC, Location Academic Medical Center,  
15 University of Amsterdam, Amsterdam, The Netherlands

16 <sup>5</sup> School of Chemistry and Biosciences, University of Bradford, Bradford, United Kingdom  
17

18 Corresponding Author:

19 Kamela Ng

20 Nationalestraat 155, Antwerp, 2000, Belgium

21 Email address: [kng@itg.be](mailto:kng@itg.be)  
22  
23  
24  
25  
26  
27  
28  
29  
30  
31  
32  
33  
34  
35  
36  
37

## 38 **Abstract**

39 **Background.** *Mycobacterium tuberculosis* rapid diagnostic tests (RDTs) are widely employed  
40 in routine laboratories and national surveys for detection of rifampicin-resistant (RR)-TB.  
41 However, as next generation sequencing technologies have become more commonplace in  
42 research and surveillance programs, RDTs are being increasingly complemented by whole  
43 genome sequencing (WGS). While comparison between RDTs is difficult, all RDT results can be  
44 derived from WGS data. This can facilitate longitudinal analysis of RR-TB burden regardless of  
45 the data generation technology employed. By converting WGS to RDT results, we enable  
46 comparison of data with different formats and sources particularly for countries that employ  
47 different diagnostic algorithms for drug resistance surveys. This allows national TB control  
48 programs (NTPs) and epidemiologists to exploit all available data for improved RR-TB  
49 surveillance.

50 **Methods.** We developed the Python-based TB Genome to Test (TBGT) tool that transforms  
51 WGS-derived data into laboratory-validated results of the primary RDTs – Xpert MTB/RIF,  
52 XpertMTB/RIF Ultra, Genotype MDRTB*plus* v2.0, and Genoscholar NTM + MDRTB II. The  
53 tool was validated through RDT results of RR-TB strains with diverse resistance patterns and  
54 geographic origins and applied on routine-derived WGS data.

55 **Results.** The TBGT tool correctly transformed the SNP data into the RDT results and generated  
56 tabulated frequencies of the RDT probes as well as rifampicin susceptible cases. The tool  
57 supplemented the RDT probe reactions output with the RR-conferring mutation based on  
58 identified SNPs.

59 **Conclusion.** Overall, the TBGT tool allows the NTP to assess whether currently implemented  
60 RDTs adequately detect RR-TB in their setting. With its feature to transform WGS to RDT  
61 results and enable longitudinal RR-TB data analysis, the TBGT tool may bridge the gap between  
62 and among data from periodic surveys, continuous surveillance, research, and routine tests, and  
63 may be integrated within the existing national connectivity platform for use by the NTP and  
64 epidemiologists to improve setting-specific RR-TB control. The TBGT source code and  
65 accompanying documentation is available at <https://github.com/KamelaNg/TBGT>.

66

## 67 **Introduction**

68 Resistance to rifampicin (RIF), the most potent anti-tuberculosis (TB) drug, hampers TB control.  
69 Rifampicin-resistant (RR)-TB persists as an urgent public health crisis as only 29% of estimated  
70 RR-TB patients world-wide were detected and notified in 2017. Further, 18% of previously  
71 treated TB patients were found to have RR-TB (WorldHealthOrganization 2018). The WHO  
72 endorsed the following rapid molecular RR-TB diagnostic test (RDTs) to address this concern:  
73 Xpert MTB/RIF (hereinafter called Xpert Classic) and the new version Xpert MTB/RIF Ultra  
74 (hereinafter called Ultra) [Cepheid, Sunnyvale, USA] that employ real-time polymerase chain  
75 reaction and molecular beacon technology (Blakemore et al. 2010); and the line probe assays -  
76 Genotype MDRTB*plus* v2.0 (hereinafter called LPA-Hain) [Hain Lifescience GmbH, Nehren,  
77 Germany]; and Genoscholar NTM + MDRTB II (hereinafter called LPA-Nipro) [NIPRO

78 Corporation, Osaka, Japan] (Dheda et al. 2017). These tests detect RR-conferring mutations  
79 within the rifampicin resistance determining region (RRDR) or hotspot of the *rpoB* gene (Andre  
80 et al. 2017; Blakemore et al. 2010; Ng et al. 2018a; Ng et al. 2018c), and revolutionized  
81 detection of RR-TB, allowing for prompt identification of patients who need to undergo adapted  
82 treatment. Xpert Classic is the most widely deployed RDT globally, implemented as the initial  
83 diagnostic tool for all presumptive pulmonary TB patients by 32 out of 48 countries in at least  
84 one of the high burden country lists (WorldHealthOrganization 2018). The wide utilization of the  
85 tests in both low and high burden TB countries resulted in the production of large volumes of  
86 RDT data, although comparisons within and between countries can be difficult due to use of  
87 differing technologies.

88  
89 The utility of next generation sequencing technologies has been widely studied for improved  
90 detection of drug-resistant TB in diverse laboratory settings worldwide (Gardy & Loman 2018).  
91 Next generation sequencing-based whole genome sequencing (WGS) of *Mycobacterium*  
92 *tuberculosis* (*Mtb*) has been shown to accurately detect RR-TB by calling relevant single  
93 nucleotide polymorphisms (SNPs) in the *rpoB* gene (Coll et al. 2018; Miotto et al. 2017). WGS  
94 is already being widely implemented in the United Kingdom, the Netherlands, and New York,  
95 aimed towards completely replacing phenotypic drug susceptibility testing in the clinic  
96 (CRyPTICConsortium et al. 2018; de Viedma 2019). WGS implemented in high burden TB  
97 countries was shown to accurately estimate the prevalence of DR-TB (Zignol et al. 2018). The  
98 conventional periodic TB drug resistance surveys have been gathering data representative of the  
99 *Mtb* population in poor resource settings, while high income countries typically apply continuous  
100 surveillance (WorldHealthOrganization 2018; Zignol et al. 2018), to help improve the choice of  
101 standard TB treatment before full drug sensitivity profile is known (WorldHealthOrganization  
102 2018).

103  
104 The increasing use of WGS in research and public health initiatives can lead to a disconnect from  
105 the RDT-based data being generated routinely in the clinic, and the majority of surveys,  
106 widening the *Mtb* data gap. We aim to bridge this *Mtb* data gap by transforming WGS data into  
107 each of the related RDT data outputs, allowing longitudinal analysis of RR-TB prevalence and  
108 underlying mutations regardless of the switch between data generation technologies. This will  
109 allow end-users to compare data of varying formats from different technologies, and analyze  
110 previous historical strains with current isolates representative of the entire TB patient population  
111 in the country. Information obtained from this analysis may unearth years' worth of data  
112 revealing RR-TB burden, circulating RR-conferring mutations, and associated RDT probe  
113 patterns in a specific setting, critical for improved RR-TB control.

114  
115 We present the TB Genome to Test (TBGT) tool, a Python 3-based set of scripts that rapidly  
116 transform WGS data type to RDT and mutation reports. The modules automatically generate  
117 frequencies of rifampicin-susceptible (RS) and RR-TB samples detected and supplement the

118 RDT probes output with the detected RR-conferring mutation in the format of ‘wild-type amino  
119 acid-codon number-mutant amino acid’.

120

## 121 **Materials & Methods**

122 We developed the TBGT tool, a Python 3-executable that converts *Mtb* WGS data in the form of  
123 variant call format (VCF) or MTBseq (Kohl et al. 2018) tab files into the most likely output that  
124 would be observed from Xpert Classic, Xpert Ultra, LPA-Hain, and LPA-Nipro based on  
125 previously validated work (Ng et al. 2018a; Ng et al. 2018c). The TBGT tool can be accessed  
126 through <https://github.com/KamelaNg/TBGT>.

127

### 128 **The TBGT tool**

129 The TBGT tool can be run on any python-enabled operating system with no additional  
130 prerequisites. The TBGT workflow is shown in Figure 1. The input is a folder of files derived  
131 from a SNP calling pipeline, either in standard VCF format or tab format as output from  
132 MTBseq. The TBGT tool assumes the standard H37Rv NC000962.3 genome was used for  
133 calling these SNPs. If not, the user may remap the genome positions to the specific RR-TB-  
134 related codons using a tab delimited mapping file. An example of this tab-separated file is  
135 bundled with the tool. By default, the module will run all the RDTs on the input files.  
136 The generated output file includes the Sample name, RIF resistance or susceptibility, the  
137 associated mutant codon position and mutation pattern, and a series of 0’s or 1’s indicating  
138 absence or presence of the capturing probe for the RDTs, and the RR-conferring mutation (An  
139 example output is given in Table 2). A summary table with counts and proportions of detected  
140 RS-TB cases, RDT probes, and RR-conferring mutations is also generated (Supplemental File  
141 Table S1).

142

### 143 **Validation and sample application of the TBGT modules**

144 We simulated VCF files for internal validation of the TBGT modules A randomly chosen VCF  
145 file was edited in Notepad ++ 7.6.3 (<https://notepad-plus-plus.org/>) to contain all previously  
146 tested and validated RR-conferring mutations (Andre et al. 2017; Miotto et al. 2017) mapped to  
147 known RDT results (Ng et al. 2018a; Ng et al. 2018c) (Table 1). We generated files with single  
148 and multiple RR mutations to ensure the tool is robust for all scenarios. These simulated VCFs  
149 are provided with the tool.

150

151 To show real world applicability, the TBGT tool was run on WGS of RS and RR -TB WHO  
152 Tropical Disease Research (TDR) strains with diverse resistance patterns and geographic origins  
153 stored in the Belgian Coordinated Collections of Microorganisms in the Institute of Tropical  
154 Medicine including the 47 TDR-TB strains tested in the previous validation of the RDTs against  
155 the available *rpoB* Sanger sequences of the strains (Ng et al. 2018a; Ng et al. 2018c; Vincent et  
156 al. 2012). The fastQ files (ENA accession PRJEB31023) for these samples were run through the  
157 MTBseq pipeline with default settings (Kohl et al. 2018) to generate the tab files for input to

158 TBGT. Additionally, WGS from 324 phenotypically RR-TB isolates of retreatment TB patients  
159 in Kinshasa, the Democratic Republic of Congo (DRC) collected in 2005-2010 (Meehan et al.  
160 2018), and 233 WGS isolated 1991- 2010 from Rwanda were subjected to the MTBseq pipeline  
161 and run through the TBGT tool.

162  
163 We were then able to extract the associated Xpert results from the 1991 to 2010 Rwandan dataset  
164 and compare it with actual Xpert results from 2012 to 2017 (Ng et al. 2018b).

165

## 166 **Results**

167 We tested the TBGT tool on a 64-bit Windows 10 Enterprise computer with a 2.50 GHz  
168 processor and a 8.00 GB of RAM. The running time was 39 milliseconds for 1 MTBseq tab file  
169 and 530 milliseconds for a VCF file.

170

171 The TBGT tool correctly transformed the WGS-derived SNPs in the VCF and MTBseq tab files  
172 into the laboratory-validated RDT probe reactions (Table 2), and accurately detected all all  
173 previously validated RR-conferring mutations in the simulated VCF and MTBseq clinical WGS  
174 data from the TDR, DRC (Figures 2A and 2B), and Rwanda (Figures 3A and 3B) strains,  
175 including double nucleotide changes – two SNPs covering two loci or genome positions – such  
176 as the CAC → AGC and CAC → TCC His445Ser mutations and combinations of any two  
177 unlinked mutations. The generated frequency and proportion tables (Supplemental File Table S1)  
178 showed the distribution of the RS and RR-TB strains, the RDT probe reactions, and the RR-  
179 conferring mutations detected.

180

181 The *in silico* extracted Xpert results from the Rwandan WGS collected in 1991-2010 revealed  
182 that the majority of RR-TB cases detected were linked with Xpert Classic probe E (Figure 3A).  
183 This observation was consistent with the actual Xpert results gathered in 2012 to 2017. Xpert  
184 Classic probe E was also predominantly seen in samples from Kinshasa, DRC (Figure 2A,  
185 Supplemental File Table S1). Mutation S450L, linked with Xpert Classic probe E, was the major  
186 RR-conferring mutation observed in both settings (Figures 2B and 3B).

187

## 188 **Discussion**

189 In this work, we developed and validated TBGT, a Python-implemented tool that extracts RR-  
190 TB RDT results from WGS-derived SNP data. If a country performed prior drug resistance  
191 surveys with a different diagnostic algorithm, the TBGT tool allows for comparing data of  
192 different formats and sources, making it possible for longitudinal analysis of previous historical  
193 data and current test results, such as periodic DRS results conducted as cross-sectional surveys,  
194 often with different technology from the previous one.

195

196 The TBGT tool allowed us to analyze almost 3 decades' worth of Xpert data from Rwanda. The  
197 longitudinal analysis of extracted Xpert results from the 1991-2010 Rwandan dataset and actual

198 Xpert results from 2012-2017 is a proof-of-concept that the TBGT tool provides an exceptional  
199 opportunity to compare and analyze old and new data produced by different technologies. The  
200 predominant Xpert Classic probe E observed in Rwanda is supported by the associated RR  
201 mutation Ser450Leu (Tables 1 and 2) being present in the primary circulating multidrug-resistant  
202 TB clone in this setting (Ngabonziza et al. 2018), and also most frequently associated with global  
203 RR-TB (Cohen et al. 2015; Coll et al. 2018; Georghiou et al. 2016).

204

205 The genome-based approach of the TBGT tool also allows for reporting of disputed mutations  
206 that confer occult RR and are frequently missed by the Mycobacterium Growth Indicator Tube  
207 phenotypic DST (Ng et al. 2018a; Van Deun et al. 2015). For instance, disputed mutation  
208 Leu452Pro, epidemiologically linked with an extensively drug-resistant TB outbreak in  
209 KwaZulu-Natal, South Africa in 2005 (Cohen et al. 2015; Ioerger et al. 2009), was detected in  
210 some strains from Kinshasa, DRC and Rwanda (Figures 2B and 3B, Supplemental File).  
211 Mutation Leu452Pro is captured by delayed Xpert Classic probe E, denoting partially inhibited  
212 probe E fluorescence (Lawn & Nicol 2011; Ng et al. 2018a), and specifically identified by the  
213 unique combination of Xpert Ultra probe rpoB4B and corresponding melting temperature shift  
214 (Table 1), provided sufficient *Mtb* DNA is detected. Leu452Pro was reported to be missed in  
215 clinical samples by LPA-Hain due its end-probe location (Al-Mutairi et al. 2011; Rigouts et al.  
216 2013), thus contributing to the RR-TB detection gap. The ability of the TBGT tool to rapidly and  
217 accurately detect disputed mutations is therefore important.

218

219 As a supplementary feature, the TBGT tool picks up any RR-conferring mutation present in the  
220 VCF or MTBseq tab file, and may help assess whether RDTs sufficiently detect RR-TB cases in  
221 specific settings.

222

223 The TBGT tool may combine clinical data stored in large aggregated files and collected through  
224 the routine laboratory and periodic survey RDT results, with WGS-derived data from national  
225 surveillance programs to create a larger picture of the RS-TB and RR-TB burden in a country.  
226 Through longitudinal analysis of previous historical and current RR-TB data, the TBGT tool may  
227 then allow the NTPs and epidemiologists to identify unusual frequencies of RR-TB cases, RDT  
228 probe reactions, and RR-conferring mutations that define a potential transmission hotspot. The  
229 setting-specific RS and RR-TB counts and proportions generated by the TBGT tool may bring  
230 about an extensive global database with years' worth of data for continuous statistical modeling  
231 analyses and surveillance investigations.

232

233 Potentially, the TBGT tool may be integrated in the national TB diagnostic algorithm through the  
234 existing connectivity platform or the newly implemented WHO cloud-based software (Dean  
235 2019). The prospective application of the TBGT tool may bridge and transform the *Mtb* data gap  
236 into action points for RR-TB clinicians to provide appropriate care for the individual TB/RR-TB  
237 patient, and the NTP, public health officials, and policy makers to intervene at the population-

238 level for improved and sustained RR-TB control (Gardy & Loman 2018). The TBGT modules  
239 could also be expanded to report non-RRDR RR-causing mutations and include other TB drugs –  
240 e.g. isoniazid, pyrazinamide, and fluoroquinolones.

241

## 242 **Conclusions**

243 Our TBGT tool leverages on the improved access to next generation sequencing technologies in  
244 this genomic epidemiology era of TB, and complement *Mtb* WGS by rapidly transforming WGS  
245 files that store genomic sequence variations to validated outputs of the RR-TB RDTs. The  
246 prospective application of the TBGT tool within a nationwide genomic epidemiology program  
247 will bridge the *Mtb* data gap among routine RDT data, research setting WGS, and periodic  
248 survey and continuous surveillance *rpoB* sequencing and WGS data. This may result in efficient  
249 longitudinal analysis of the circulating RDT probes and underlying distribution of RR-conferring  
250 mutations. The TBGT tool may also help assess whether currently implemented RDT(s)  
251 adequately detect the RR-TB cases in the country. Linking the TBGT tool to the RR-TB  
252 algorithm we previously developed (Ng et al. 2018b) will help identify unusual frequencies of  
253 RR-TB cases as well as rare RDT probes and RR mutations that define a potential transmission  
254 hotspot, critical for active surveillance of transmitted strains in a population by the NTP.

255

## 256 **Acknowledgements**

257 We thank Button Ricarte for his insightful feedback on the manuscript.

258

## 259 **ADDITIONAL INFORMATION AND DECLARATIONS**

### 260 **Funding**

261 This work was supported by the Erasmus Mundus Joint Doctorate Fellowship grant  
262 2016-1346 to K.C.S.N.

263

### 264 **Competing Interests**

265 The authors declare that they have no competing interests.

266

### 267 **Author Contributions**

268 K. C. S. Ng conceived and designed the study, wrote, implemented, troubleshooted, and finalized  
269 the scripts, generated simulated VCF files, performed internal validation and real-world  
270 application of the TBGT tool, analyzed and interpreted the data, wrote first draft of the  
271 manuscript, revised and approved final paper.

272 J. C. S. Ngabonziza generated MTBseq tab files of Rwanda WGS for validation of the modules,  
273 reviewed drafts of the manuscript, and approved final paper.

274 P. L. curated the TDR WGS, reviewed drafts of the manuscript, and approved final paper.

275 B. C. de Jong reviewed drafts of the manuscript and approved final paper.

276 F. van Leth reviewed drafts of the manuscript and approved final paper.

277 C. J. Meehan conceived and designed the study, refined, troubleshooted, and finalized the  
278 scripts, generated MTBseq tab files of TDR and Kinshasa, DRC WGS for validation of the  
279 modules, authored and reviewed drafts of the manuscript, and approved final paper.

280

### 281 **Data Availability**

282 All scripts and data for validation may be accessed through:

283 <https://github.com/KamelaNg/TBGT>.

284

### 285 **Supplemental Information**

286 Supplemental information for this article can be found online at:

287

### 288 **References**

289 Al-Mutairi NM, Ahmad S, and Mokaddas E. 2011. Performance comparison of four methods for  
290 detecting multidrug-resistant Mycobacterium tuberculosis strains. *Int J Tuberc Lung Dis* 15:110-  
291 115.

292 Andre E, Goeminne L, Cabibbe A, Beckert P, Kabamba Mukadi B, Mathys V, Gagneux S,  
293 Niemann S, Van Ingen J, and Cambau E. 2017. Consensus numbering system for the rifampicin  
294 resistance-associated *rpoB* gene mutations in pathogenic mycobacteria. *Clin Microbiol Infect*  
295 23:167-172. 10.1016/j.cmi.2016.09.006

296 Blakemore R, Story E, Helb D, Kop J, Banada P, Owens MR, Chakravorty S, Jones M, and  
297 Alland D. 2010. Evaluation of the analytical performance of the Xpert MTB/RIF assay. *J Clin*  
298 *Microbiol* 48:2495-2501. 10.1128/JCM.00128-10

299 Cohen KA, Abeel T, Manson McGuire A, Desjardins CA, Munsamy V, Shea TP, Walker BJ,  
300 Bantubani N, Almeida DV, Alvarado L, Chapman SB, Mvelase NR, Duffy EY, Fitzgerald MG,  
301 Govender P, Gujja S, Hamilton S, Howarth C, Larimer JD, Maharaj K, Pearson MD, Priest ME,  
302 Zeng Q, Padayatchi N, Grosset J, Young SK, Wortman J, Mlisana KP, O'Donnell MR, Birren  
303 BW, Bishai WR, Pym AS, and Earl AM. 2015. Evolution of Extensively Drug-Resistant  
304 Tuberculosis over Four Decades: Whole Genome Sequencing and Dating Analysis of  
305 Mycobacterium tuberculosis Isolates from KwaZulu-Natal. *PLoS Med* 12:e1001880.  
306 10.1371/journal.pmed.1001880

307 Coll F, Phelan J, Hill-Cawthorne GA, Nair MB, Mallard K, Ali S, Abdallah AM, Alghamdi S,  
308 Alsomali M, Ahmed AO, Portelli S, Oppong Y, Alves A, Bessa TB, Campino S, Caws M,  
309 Chatterjee A, Crampin AC, Dheda K, Furnham N, Glynn JR, Grandjean L, Minh Ha D, Hasan R,  
310 Hasan Z, Hibberd ML, Joloba M, Jones-Lopez EC, Matsumoto T, Miranda A, Moore DJ,  
311 Mocillo N, Panaiotov S, Parkhill J, Penha C, Perdigo J, Portugal I, Rchiad Z, Robledo J, Sheen  
312 P, Shesha NT, Sirgel FA, Sola C, Oliveira Sousa E, Streicher EM, Helden PV, Viveiros M,  
313 Warren RM, McNerney R, Pain A, and Clark TG. 2018. Genome-wide analysis of multi- and  
314 extensively drug-resistant Mycobacterium tuberculosis. *Nat Genet* 50:307-316. 10.1038/s41588-  
315 017-0029-0



316 CRyPTICConsortium, the GP, Allix-Beguec C, Arandjelovic I, Bi L, Beckert P, Bonnet M,  
317 Bradley P, Cabibbe AM, Cancino-Munoz I, Caulfield MJ, Chaiprasert A, Cirillo DM, Clifton  
318 DA, Comas I, Crook DW, De Filippo MR, de Neeling H, Diel R, Drobniewski FA, Faksri K,  
319 Farhat MR, Fleming J, Fowler P, Fowler TA, Gao Q, Gardy J, Gascoyne-Binzi D, Gibertoni-  
320 Cruz AL, Gil-Brusola A, Golubchik T, Gonzalo X, Grandjean L, He G, Guthrie JL, Hoosdally S,  
321 Hunt M, Iqbal Z, Ismail N, Johnston J, Khanzada FM, Khor CC, Kohl TA, Kong C, Lipworth S,  
322 Liu Q, Maphalala G, Martinez E, Mathys V, Merker M, Miotto P, Mistry N, Moore DAJ, Murray  
323 M, Niemann S, Omar SV, Ong RT, Peto TEA, Posey JE, Prammananan T, Pym A, Rodrigues C,  
324 Rodrigues M, Rodwell T, Rossolini GM, Sanchez Padilla E, Schito M, Shen X, Shendure J,  
325 Sintchenko V, Sloutsky A, Smith EG, Snyder M, Soetaert K, Starks AM, Supply P, Suriyapol P,  
326 Tahseen S, Tang P, Teo YY, Thuong TNT, Thwaites G, Tortoli E, van Soolingen D, Walker AS,  
327 Walker TM, Wilcox M, Wilson DJ, Wyllie D, Yang Y, Zhang H, Zhao Y, and Zhu B. 2018.  
328 Prediction of Susceptibility to First-Line Tuberculosis Drugs by DNA Sequencing. *N Engl J Med*  
329 379:1403-1415. 10.1056/NEJMoa1800474  
330 de Viedma DG. 2019. Pathways and strategies followed in the genomic epidemiology of  
331 *Mycobacterium tuberculosis*. *Infect Genet Evol.* 10.1016/j.meegid.2019.01.027  
332 Dean A. 2019. Sequencing for the surveillance of drug-resistant TB. WHO Global TB  
333 Programme.  
334 Dheda K, Gumbo T, Maartens G, Dooley KE, McNerney R, Murray M, Furin J, Nardell EA,  
335 London L, Lessem E, Theron G, van Helden P, Niemann S, Merker M, Dowdy D, Van Rie A,  
336 Siu GK, Pasipanodya JG, Rodrigues C, Clark TG, Sirgel FA, Esmail A, Lin HH, Atre SR, Schaaf  
337 HS, Chang KC, Lange C, Nahid P, Udawadia ZF, Horsburgh CR, Jr., Churchyard GJ, Menzies D,  
338 Hesseling AC, Nuermberger E, McIlleron H, Fennelly KP, Goemaere E, Jaramillo E, Low M,  
339 Jara CM, Padayatchi N, and Warren RM. 2017. The epidemiology, pathogenesis, transmission,  
340 diagnosis, and management of multidrug-resistant, extensively drug-resistant, and incurable  
341 tuberculosis. *Lancet Respir Med.* 10.1016/S2213-2600(17)30079-6  
342 Gardy JL, and Loman NJ. 2018. Towards a genomics-informed, real-time, global pathogen  
343 surveillance system. *Nat Rev Genet* 19:9-20. 10.1038/nrg.2017.88  
344 Georghiou SB, Seifert M, Catanzaro D, Garfein RS, Valafar F, Crudu V, Rodrigues C, Victor  
345 TC, Catanzaro A, and Rodwell TC. 2016. Frequency and Distribution of Tuberculosis  
346 Resistance-Associated Mutations between Mumbai, Moldova, and Eastern Cape. *Antimicrob*  
347 *Agents Chemother* 60:3994-4004. 10.1128/AAC.00222-16  
348 Ioerger TR, Koo S, No EG, Chen X, Larsen MH, Jacobs WR, Jr., Pillay M, Sturm AW, and  
349 Sacchettini JC. 2009. Genome analysis of multi- and extensively-drug-resistant tuberculosis from  
350 KwaZulu-Natal, South Africa. *PLoS One* 4:e7778. 10.1371/journal.pone.0007778  
351 Kohl TA, Utpatel C, Schleusener V, De Filippo MR, Beckert P, Cirillo DM, and Niemann S.  
352 2018. MTBseq: a comprehensive pipeline for whole genome sequence analysis of  
353 *Mycobacterium tuberculosis* complex isolates. *PeerJ* 6:e5895. 10.7717/peerj.5895

354 Lawn SD, and Nicol MP. 2011. Xpert(R) MTB/RIF assay: development, evaluation and  
355 implementation of a new rapid molecular diagnostic for tuberculosis and rifampicin resistance.  
356 *Future Microbiol* 6:1067-1082. 10.2217/fmb.11.84

357 Miotto P, Tessema B, Tagliani E, Chindelevitch L, Starks AM, Emerson C, Hanna D, Kim PS,  
358 Liwski R, Zignol M, Gilpin C, Niemann S, Denkinge CM, Fleming J, Warren RM, Crook D,  
359 Posey J, Gagneux S, Hoffner S, Rodrigues C, Comas I, Engelthaler DM, Murray M, Alland D,  
360 Rigouts L, Lange C, Dheda K, Hasan R, Ranganathan UDK, McNerney R, Ezewudo M, Cirillo  
361 DM, Schito M, Koser CU, and Rodwell TC. 2017. A standardised method for interpreting the  
362 association between mutations and phenotypic drug resistance in *Mycobacterium tuberculosis*.  
363 *Eur Respir J* 50. 10.1183/13993003.01354-2017

364 Ng KC, Meehan CJ, Torrea G, Goeminne L, Diels M, Rigouts L, de Jong BC, and Andre E.  
365 2018a. Potential Application of Digitally Linked Tuberculosis Diagnostics for Real-Time  
366 Surveillance of Drug-Resistant Tuberculosis Transmission: Validation and Analysis of Test  
367 Results. *JMIR Med Inform* 6:e12. 10.2196/medinform.9309

368 Ng KCS, Ngabonziza JCS, Meehan CJ, Migambi P, de Jong BC, Cobelens F, and van Leth F.  
369 2018b. Automated algorithm for early identification of rifampicin-resistant tuberculosis  
370 transmission hotspots in Rwanda. *The International Journal of Tuberculosis and Lung Disease*  
371 22:S1 – S652.

372 Ng KCS, van Deun A, Meehan CJ, Torrea G, Driesen M, Gabriels S, Rigouts L, Andre E, and de  
373 Jong BC. 2018c. Xpert Ultra Can Unambiguously Identify Specific Rifampin Resistance-  
374 Conferring Mutations. *J Clin Microbiol* 56. 10.1128/JCM.00686-18

375 Ngabonziza JCS, Rigouts L, Mazarati JB, Uwizeye C, Nyaruhirira AU, Torrea G, de Jong BC,  
376 and Meehan CJ. 2018. Transmission drives the increase of multidrug-resistant tuberculosis in  
377 Rwanda. *The International Journal of Tuberculosis and Lung Disease* 22:S1 – S652.

378 Rigouts L, Gumusboga M, de Rijk WB, Nduwamahoro E, Uwizeye C, de Jong B, and Van Deun  
379 A. 2013. Rifampin resistance missed in automated liquid culture system for *Mycobacterium*  
380 *tuberculosis* isolates with specific *rpoB* mutations. *J Clin Microbiol* 51:2641-2645.  
381 10.1128/JCM.02741-12

382 Van Deun A, Aung KJ, Hossain A, de Rijk P, Gumusboga M, Rigouts L, and de Jong BC. 2015.  
383 Disputed *rpoB* mutations can frequently cause important rifampicin resistance among new  
384 tuberculosis patients. *Int J Tuberc Lung Dis* 19:185-190. 10.5588/ijtld.14.0651

385 Vincent V, Rigouts L, Nduwamahoro E, Holmes B, Cunningham J, Guillermin M, Nathanson CM,  
386 Moussy F, De Jong B, Portaels F, and Ramsay A. 2012. The TDR Tuberculosis Strain Bank: a  
387 resource for basic science, tool development and diagnostic services. *Int J Tuberc Lung Dis*  
388 16:24-31. 10.5588/ijtld.11.0223

389 WorldHealthOrganization. 2018. Global tuberculosis report.

390 Zignol M, Cabibbe AM, Dean AS, Glaziou P, Alikhanova N, Ama C, Andres S, Barbova A,  
391 Borbe-Reyes A, Chin DP, Cirillo DM, Colvin C, Dadu A, Dreyer A, Driesen M, Gilpin C, Hasan  
392 R, Hasan Z, Hoffner S, Hussain A, Ismail N, Kamal SMM, Khanzada FM, Kimerling M, Kohl  
393 TA, Mansjo M, Miotto P, Mukadi YD, Mvusi L, Niemann S, Omar SV, Rigouts L, Schito M,

394 Sela I, Seyfaddinova M, Skenders G, Skrahina A, Tahseen S, Wells WA, Zhurilo A, Weyer K,  
395 Floyd K, and Raviglione MC. 2018. Genetic sequencing for surveillance of drug resistance in  
396 tuberculosis in highly endemic countries: a multi-country population-based surveillance study.  
397 *Lancet Infect Dis* 18:675-683. 10.1016/S1473-3099(18)30073-2.

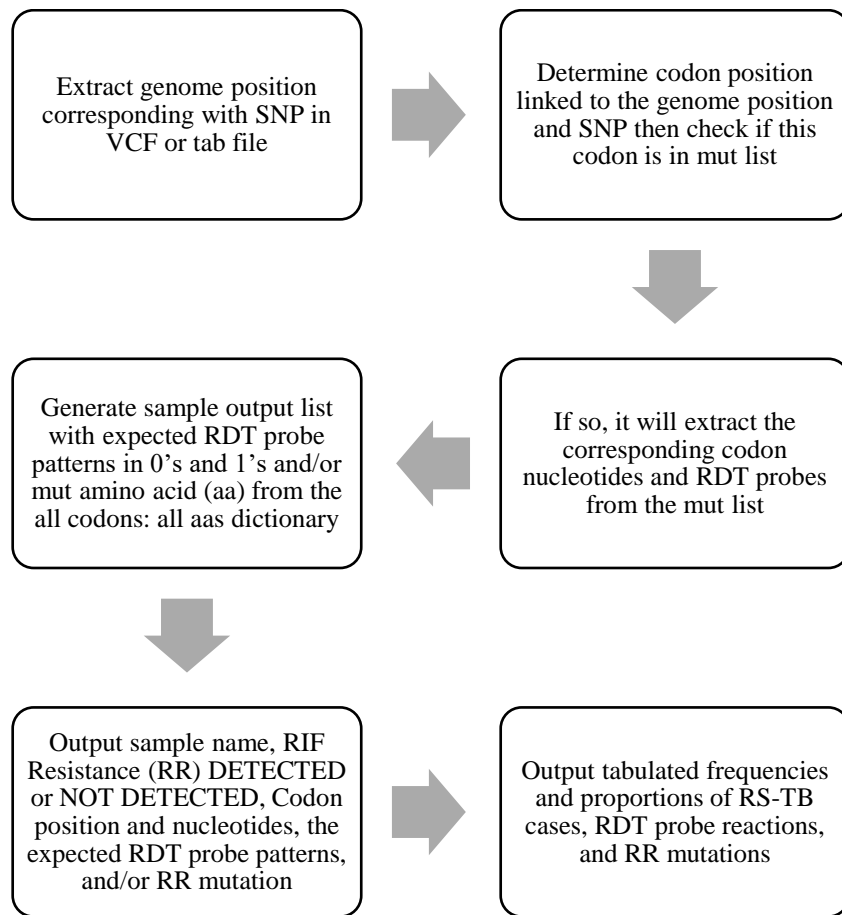

Figure 1. The TBGT tool workflow.

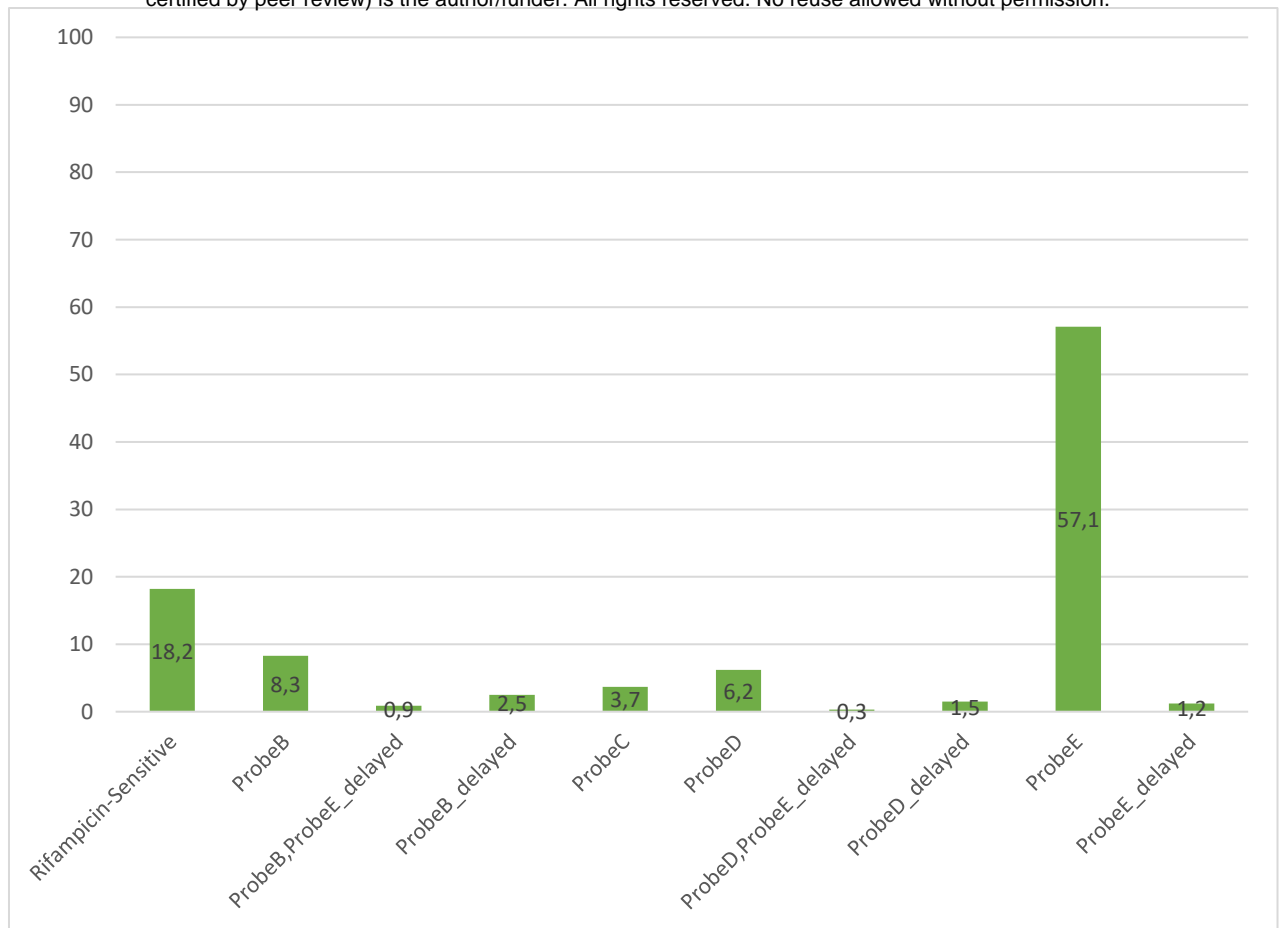

Figure 2A. Distribution of rifampicin-sensitive (RS) samples and Xpert Classic probes among rifampicin-resistant tuberculosis (RR-TB) isolates in Kinshasa, DRC from 2005 to 2010, detected by the TBGT tool.

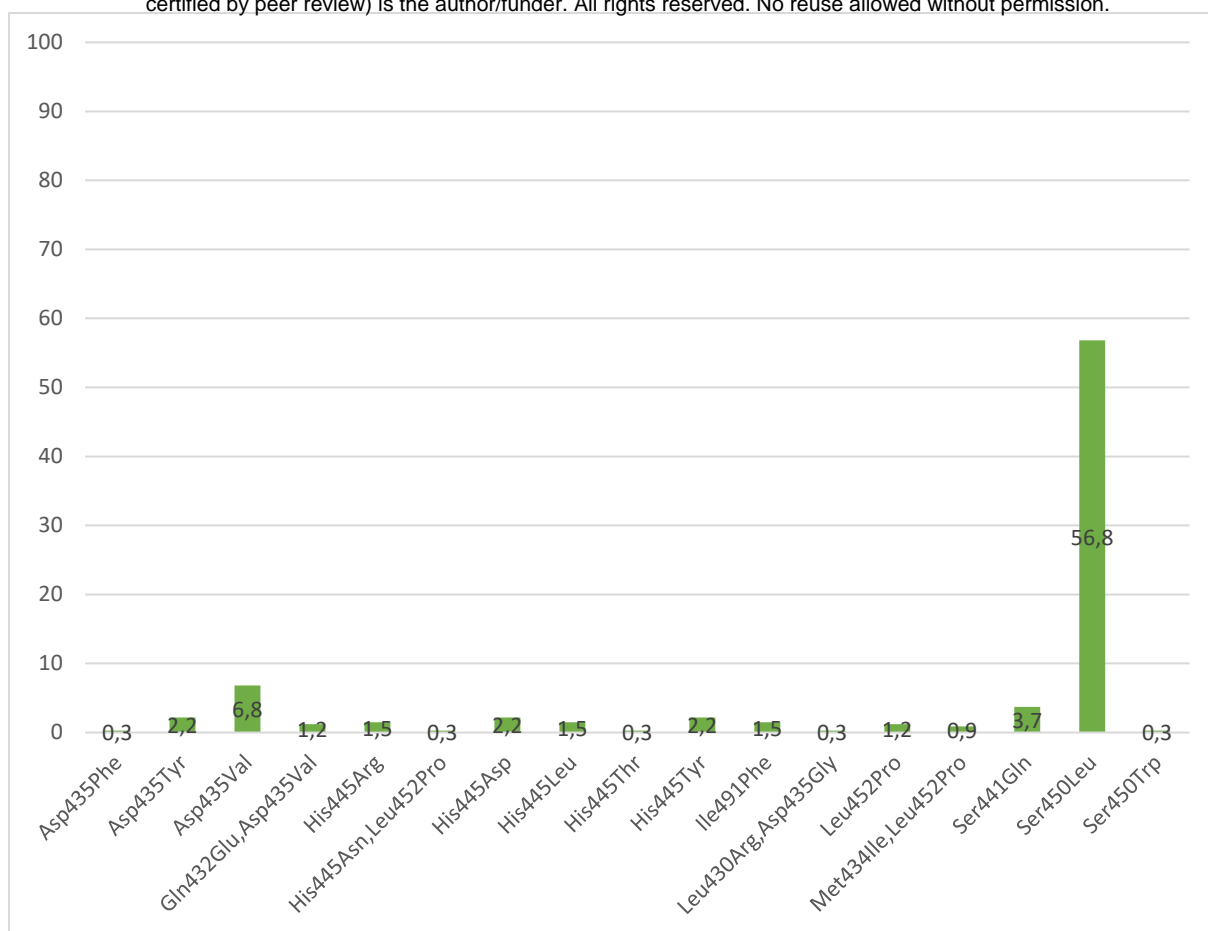

Figure 2B. Distribution of RR-conferring mutations in Kinshasa, DRC from 2005 to 2010, detected by the TBGT tool.

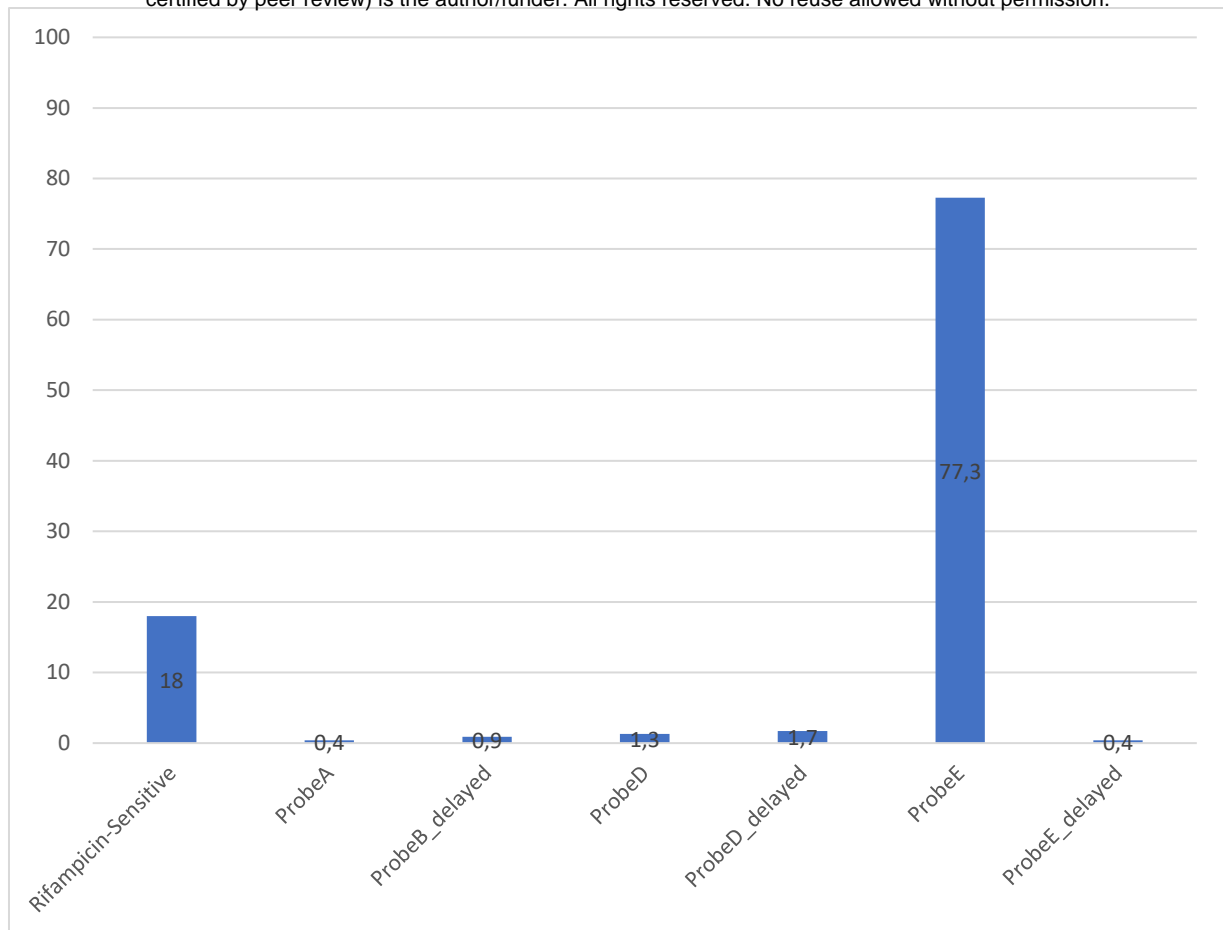

Figure 3A. Distribution of rifampicin-sensitive (RS) samples and Xpert Classic probes among rifampicin-resistant tuberculosis (RR-TB) isolates in Rwanda from 1991 to 2010, determined by the TBGT tool.

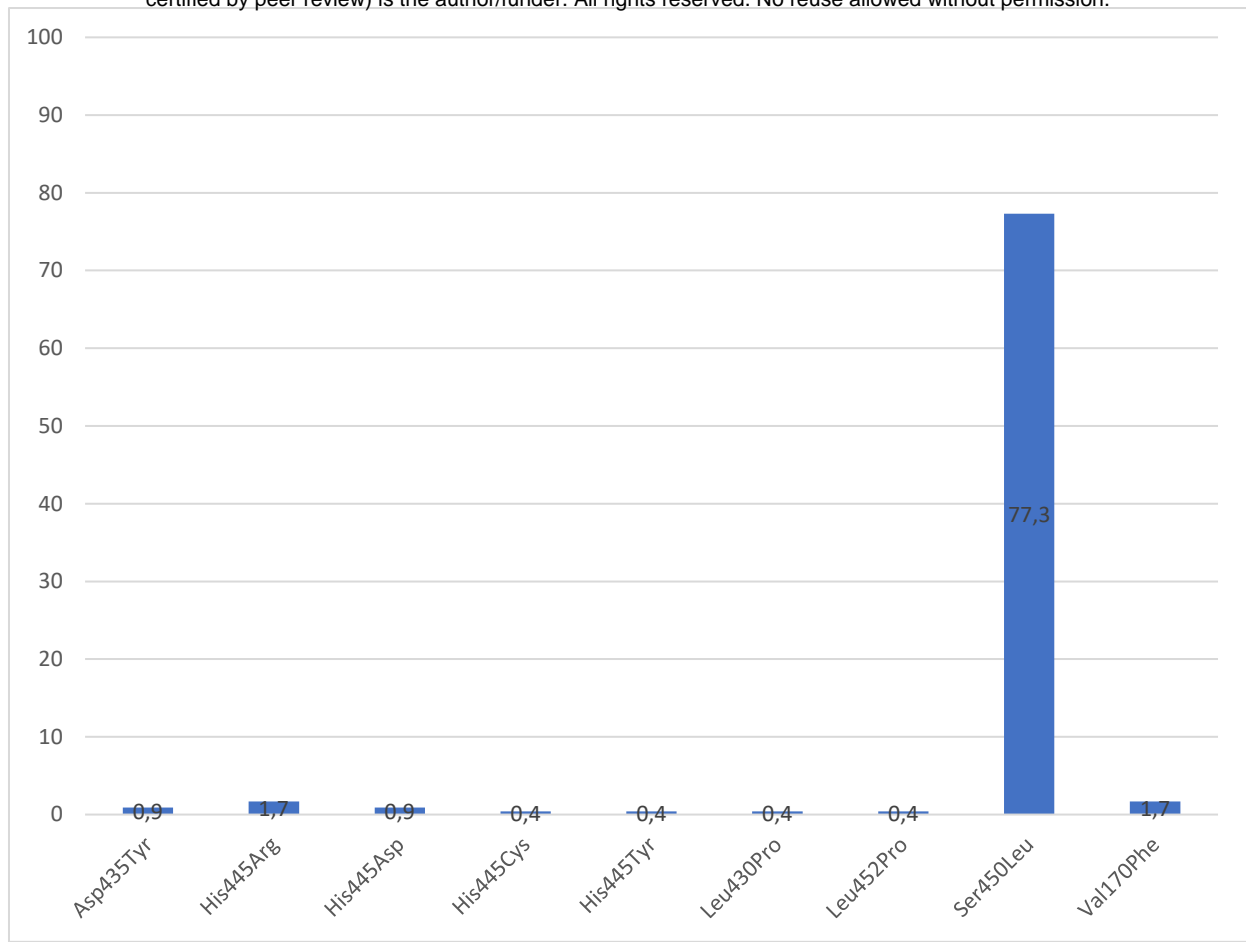

Figure 3B. Distribution of RR-conferring mutations in Rwanda from 1991 to 2010, detected by the TBGT tool.



Table 1. Rifampicin resistance (RR)-conferring mutations and associated rapid diagnostic test (RDT) results, previously tested and validated, and used as basis for developing the TBGT tool.

| RR-TB RDT        |                 |                           |                   |                        |                   |                        |           |
|------------------|-----------------|---------------------------|-------------------|------------------------|-------------------|------------------------|-----------|
| Xpert Classic    | Xpert Ultra     | LPA-Hain                  |                   | LPA-Nipro              |                   | RR mutation            |           |
| Capturing probe  | Capturing probe | Melting temperature shift | Absent (WT) probe | Developing (MUT) probe | Absent (WT) probe | Developing (MUT) probe |           |
| ND               | ND              | ND                        | ND                | ND                     | ND                | ND                     | Val170Phe |
| Probe A          | rpoB1           | 3.5                       | WT1               |                        | S1                |                        | Ser428Arg |
| Probe A          | rpoB1           | 5.9-6.3                   | WT2               |                        | S1                |                        | Leu430Pro |
| Probe A, Probe B | rpoB1           | 2.9                       | WT2               |                        | S1                |                        | Ser431Gly |
| Probe B          | rpoB1           | 3.4                       | WT2, WT3          |                        | S1                |                        | Gln432Glu |
| Probe B          | rpoB2           | 3.2                       | WT3               |                        | S2                |                        | Met434Ile |
| Probe B          | rpoB2           | 3.3                       | WT3               |                        | S2                |                        | Met434Thr |
| Probe B          | rpoB1           | 6.3                       | WT3               |                        | S2                |                        | Met434Val |
| Probe B          | rpoB2           | 2.8                       | WT3, WT4          |                        | S2                |                        | Asp435Glu |
| Probe B delayed  | rpoB2           | 5.3                       | WT3, WT4          |                        | S2                |                        | Asp435Phe |
| Probe B          | rpoB2           | 3.3                       | WT3, WT4          |                        | S2                |                        | Asp435Gly |
| Probe B          | rpoB2           | 3.5-3.7                   | WT3, WT4          | MUT1                   | S2                | R2                     | Asp435Val |
| Probe B delayed  | rpoB2           | 4.0-4.4                   | WT3, WT4          |                        | S2                |                        | Asp435Tyr |
| Probe C          | rpoB2           | 6.4                       | WT4               |                        | S2                |                        | Asn437Asp |
| Probe C          | rpoB2; rpoB3    | 3.0; 2.3                  | WT5, WT6          |                        | S3                |                        | Ser441Leu |
| Probe C          | rpoB2; rpoB3    | 4.7; 2.3                  | WT5, WT6          |                        | S3                |                        | Ser441Gln |
| Probe D          | rpoB3           | 3.7-3.9                   | WT7               | MUT2B                  | S4                | R4b                    | His445Asp |
| Probe D          | rpoB3           | 4.9                       | WT7               |                        | S4                |                        | His445Gly |
| Probe D          | rpoB3           | 3.5-3.6                   | WT7               |                        | S4                |                        | His445Leu |
| Probe D          | rpoB3           | 3.4-3.5                   | WT7               |                        | S4                |                        | His445Asn |

| RR-TB RDT       |                 |                           |                   |                        |                   |                        |                 |
|-----------------|-----------------|---------------------------|-------------------|------------------------|-------------------|------------------------|-----------------|
| Xpert Classic   | Xpert Ultra     |                           | LPA-Hain          |                        | LPA-Nipro         |                        | RR mutation     |
| Capturing probe | Capturing probe | Melting temperature shift | Absent (WT) probe | Developing (MUT) probe | Absent (WT) probe | Developing (MUT) probe |                 |
| Probe D         | rpoB3           | 3.6                       | WT7               |                        | S4                |                        | His445Gln (CAG) |
| Probe D         | rpoB3           | 4.1                       | WT7               |                        | S4                |                        | His445Gln (CAA) |
| Probe D delayed | rpoB3           | 1.9                       | WT7               |                        | S4                |                        | His445Arg       |
| Probe D         | rpoB3           | 4.7                       | WT7               |                        | S4                |                        | His445Ser       |
| Probe D         | rpoB3           | 4.9                       | WT7               |                        | S4                |                        | His445Thr       |
| Probe D         | rpoB3           | 3.2-3.3                   | WT7               | MUT2A                  | S4                | R4a                    | His445Tyr       |
| Probe D         | rpoB4B          | 5.0                       | WT7               |                        | S4                |                        | Lys446Gln       |
| Probe E         | rpoB3           | 4.0                       | WT8               |                        | S5                |                        | Ser450Phe       |
| Probe E         | rpoB3; rpoB4A   | 2.5-2.9; 6.0-6.5          | WT8               | MUT3                   | S5                | R5                     | Ser450Leu       |
| Probe E         | rpoB3; rpoB4A   | 2.3-2.7; 3.3-3.7          | WT8               |                        | S5                |                        | Ser450Trp       |
| Probe E delayed | rpoB4B          | 5.7-6.1                   | WT8               |                        | S5                |                        | Leu452Pro       |
| ND              | ND              | ND                        | ND                | ND                     | ND                | ND                     | Ile491Phe       |

Capturing probe, RDT probe associated with the RR-conferring mutation; Melting temperature shift, difference between mutant (MUT) and wild-type (WT) melting temperatures; ND, 'not detected', refers to mutations outside the RR determining region, not detected by the RR-TB RDTs.

Table 2. Example of combined results from the TBGT tool rapid diagnostic test (RDT) modules supplemented by the rifampicin resistance (RR)-conferring mutations detected

| Filename   | RIF Resistance                                                      | Codon number | Codon | Xpert Classic      |                | Xpert Ultra                                |               | LPA-Hain        |                               | LPA-Nipro       |                         | RR mutation |
|------------|---------------------------------------------------------------------|--------------|-------|--------------------|----------------|--------------------------------------------|---------------|-----------------|-------------------------------|-----------------|-------------------------|-------------|
|            |                                                                     |              |       | Capturing probe    | Probe pattern  | Capturing probe, Melting temperature shift | Probe pattern | Capturing probe | Probe pattern                 | Capturing probe | Probe pattern           |             |
| DRC-052577 | DETECTED                                                            | 450          | TTG   | Probe E            | 1 1 1 1 0<br>1 | rpoB3,rpoB4<br>A; 2.5-<br>2.9,6.0-6.5      | 1 1 0 0 1     | WT8,<br>MUT3    | 1 1 1 1<br>1 1 1 0<br>0 0 0 1 | S5, R5          | 1 1 1 1<br>0 0 0 0<br>1 | Ser450Leu   |
| DRC-091003 | DETECTED                                                            | 452          | CCG   | Probe E<br>delayed | 1 1 1 1 1<br>0 | rpoB4B; 5.7-<br>6.1                        | 1 1 1 1 0     | WT8             | 1 1 1 1<br>1 1 1 0<br>0 0 0 0 | S5              | 1 1 1 1<br>0 0 0 0<br>0 | Leu452Pro   |
| 1993-09004 | DETECTED<br>(only by<br><i>rpoB</i> Sanger<br>sequencing<br>module) | 170          | TTC   | NOT DETECTED       |                | NOT DETECTED                               |               | NOT DETECTED    |                               | NOT DETECTED    |                         | Val170Phe   |
| DRC-101308 | DETECTED<br>(only by<br><i>rpoB</i> Sanger<br>sequencing<br>module) | 491          | TTC   | NOT DETECTED       |                | NOT DETECTED                               |               | NOT DETECTED    |                               | NOT DETECTED    |                         | Ile491Phe   |
